# Supplementary material for: Understanding the growth mechanisms of γ-GeSe for polymorph-selective large-area deposition
Source: Royal Society of Chemistry journal article supplement (doi:10.1039/d4tc01666a), 2024-01-01
Supplement: d4tc01666a1.pdf [file d4tc01666a1.pdf]

**Supplementary Information for**

# Understanding the Growth Mechanisms of $\gamma$ -GeSe for Polymorph-Selective Large-Area Growth

*Joong-Eon Jung,<sup>1</sup> Sol Lee,<sup>1</sup> Hani Kang,<sup>1</sup> Myeongjin Jang,<sup>1</sup> Jinsub Park,<sup>1</sup> Petri Mustonen,<sup>2</sup>  
Harri Lipsanen,<sup>2</sup> Zhipei Sun,<sup>2</sup> Hoon Hahn Yoon<sup>3</sup> and Kwanpyo Kim<sup>1,\*</sup>*

<sup>1</sup>Department of Physics, Yonsei University, Seoul 03722, Korea

<sup>2</sup>Department of Electronics and Nanoengineering, Aalto University, Espoo 02150, Finland

<sup>3</sup>Department of Semiconductor Engineering, School of Electrical Engineering and Computer Science, Gwangju Institute of Science and Technology, Gwangju, 61005, Republic of Korea

\*Address correspondence to K.K. ([kpkim@yonsei.ac.kr](mailto:kpkim@yonsei.ac.kr))

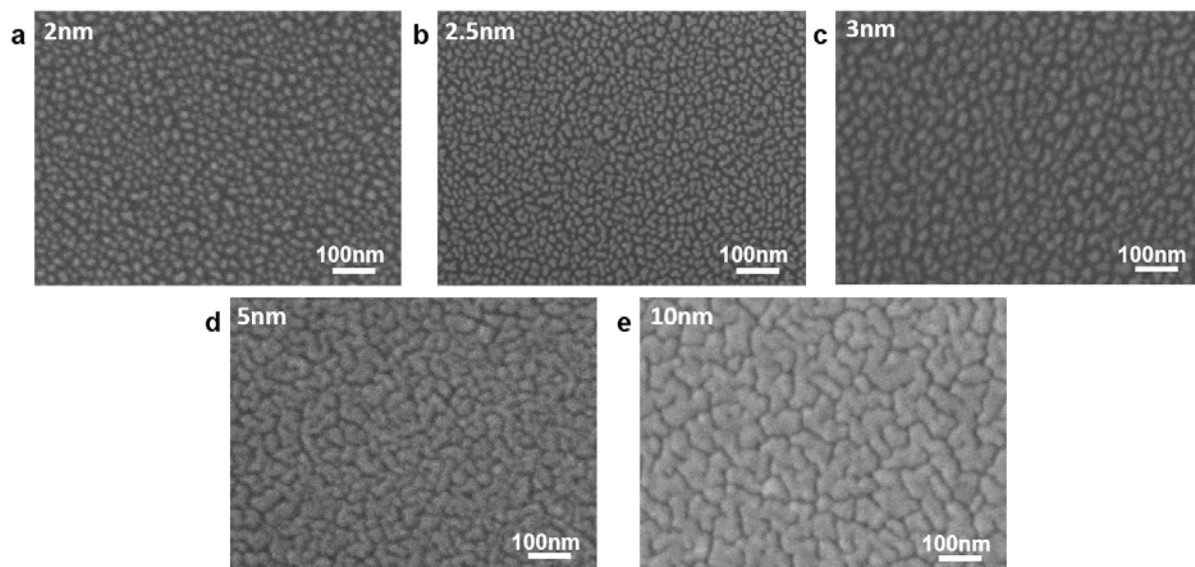

**Supplementary Figure S1. SEM images of Au deposited at various thicknesses on SiO<sub>2</sub>/Si substrates. (a) Au 2 nm, (b) 2.5 nm, (c) 3 nm, (d) 5 nm, and (e) 10 nm.**

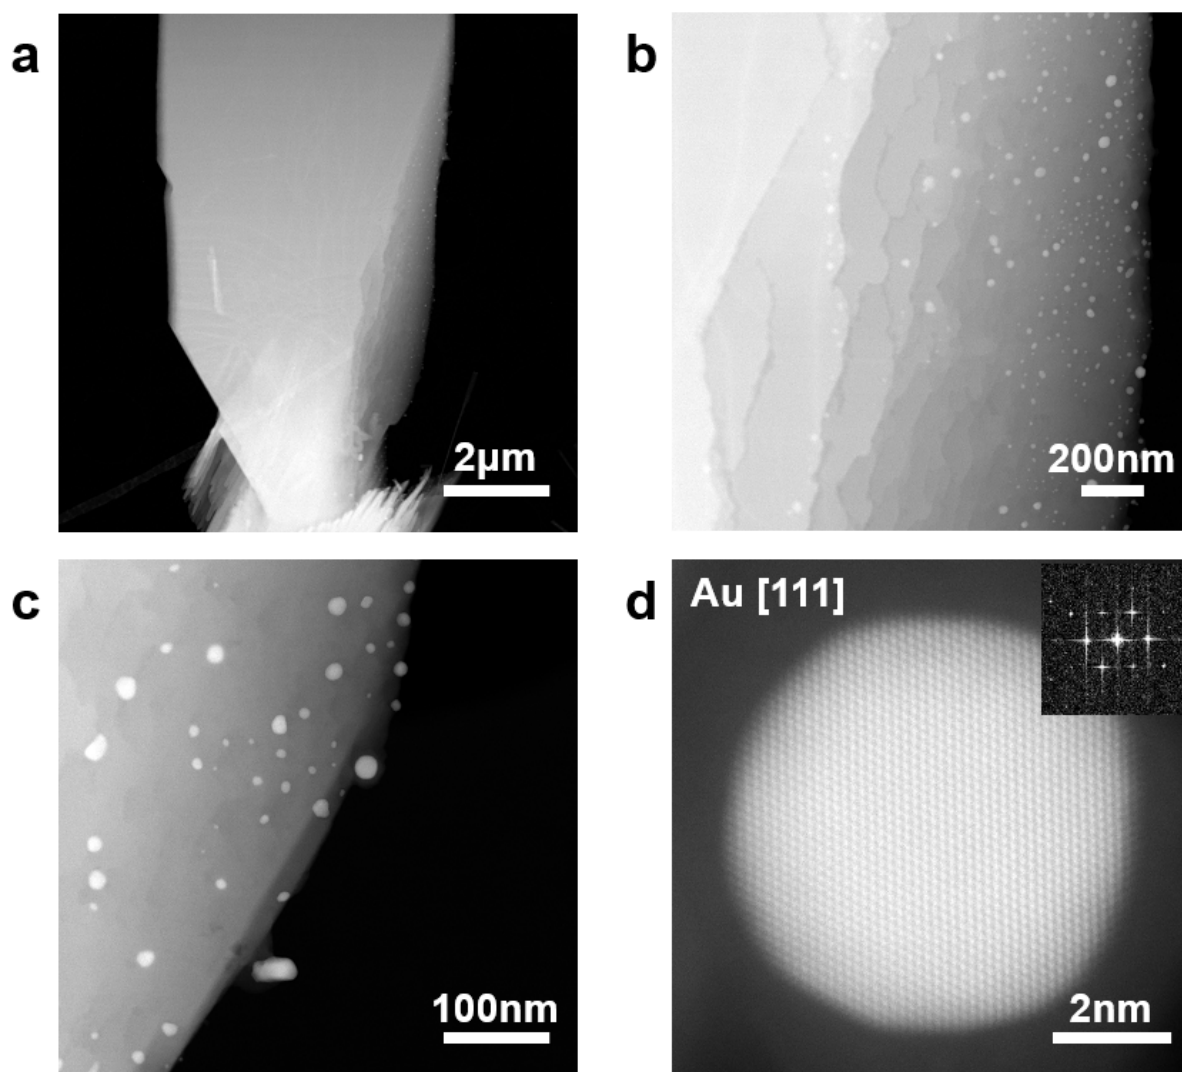

**Supplementary Figure S2. Au nanoparticles on the surface of  $\gamma$ -GeSe.** (a) STEM image of a  $\gamma$ -GeSe flake. (b,c) Enlarged images from panel a. Multiple Au nanoparticles on the  $\gamma$ -GeSe surface were observed. (d) Zoomed-in STEM image of an Au nanoparticle with [111] zone axis. The inset shows the fast Fourier transform (FFT) image.

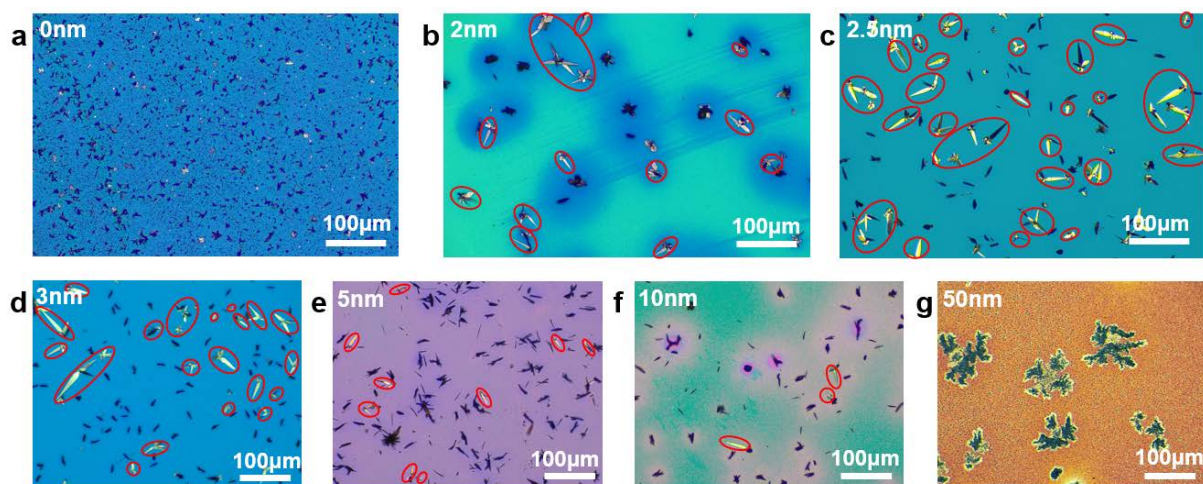

**Supplementary Figure S3.  $\gamma$ -GeSe synthesis depending on the thickness of deposited Au.**

(a) Optical image of growth product without Au deposition. (b) Optical image of synthesizing  $\gamma$ -GeSe by depositing 2 nm of Au. (c) 2.5 nm. (d) 3 nm. (e) 5 nm. (f) 10 nm. (g) Optical image of growth product with 50 nm of Au.  $\gamma$ -GeSe was not synthesized. The crystals marked with red circles are  $\gamma$ -GeSe.

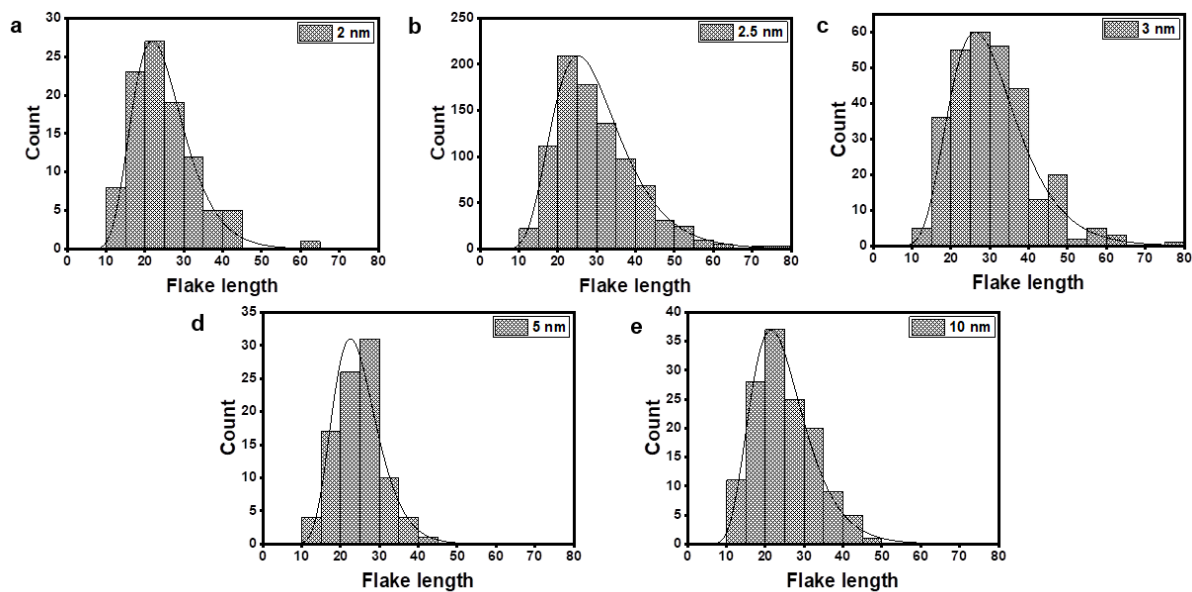

**Supplementary Figure S4. Histogram of  $\gamma$ -GeSe flake length depending on the thickness of deposited Au.** (a) 2 nm, (b) 2.5 nm, (c) 3 nm, (d) 5 nm, and (e) 10 nm.

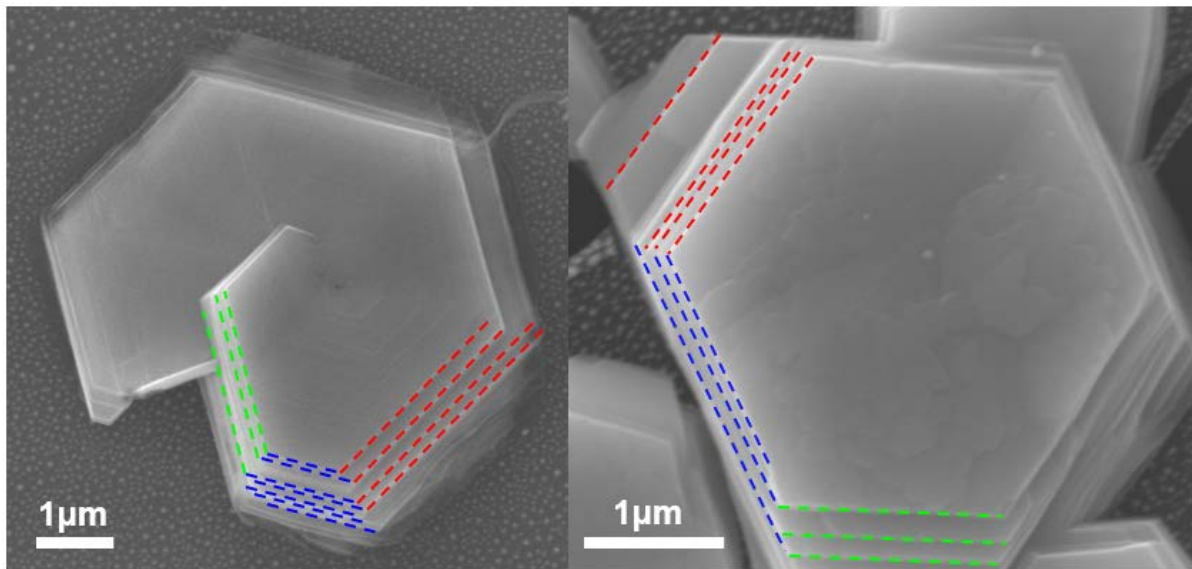

**Supplementary Figure S5. Spiral growth of  $\gamma$ -GeSe crystal.** SEM images of  $\gamma$ -GeSe display the spiral growth shape. Dashed lines indicate the crystal edges.

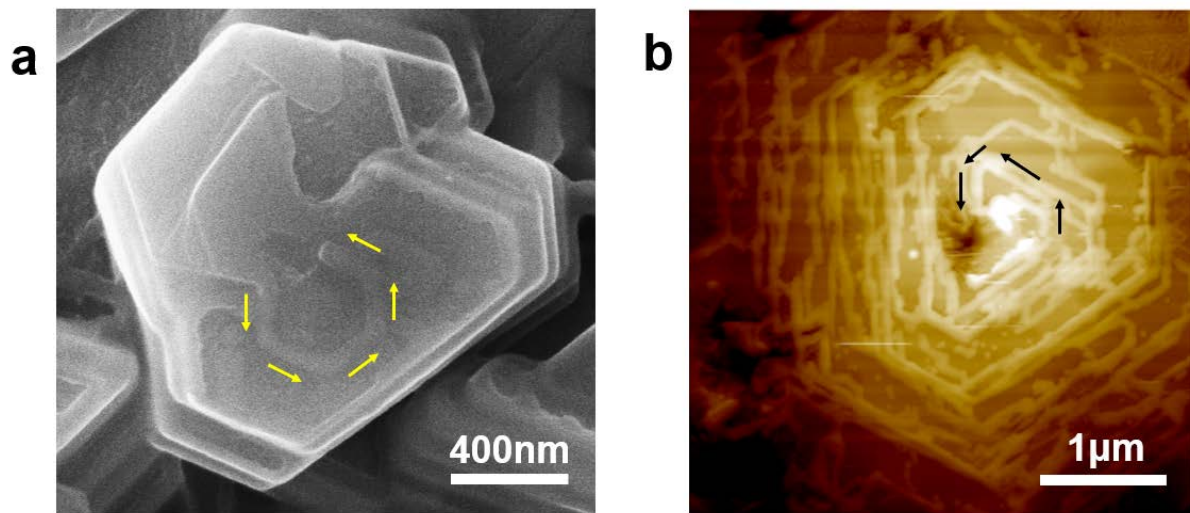

**Supplementary Figure S6. Investigation of  $\gamma$ -GeSe surface topography.** (a) SEM image of the alloy droplet trajectory on the  $\gamma$ -GeSe surface. Yellow arrows indicate the trajectory of droplet movement. (b) AFM measurement of  $\gamma$ -GeSe crystal. Black arrows indicate the trajectories.

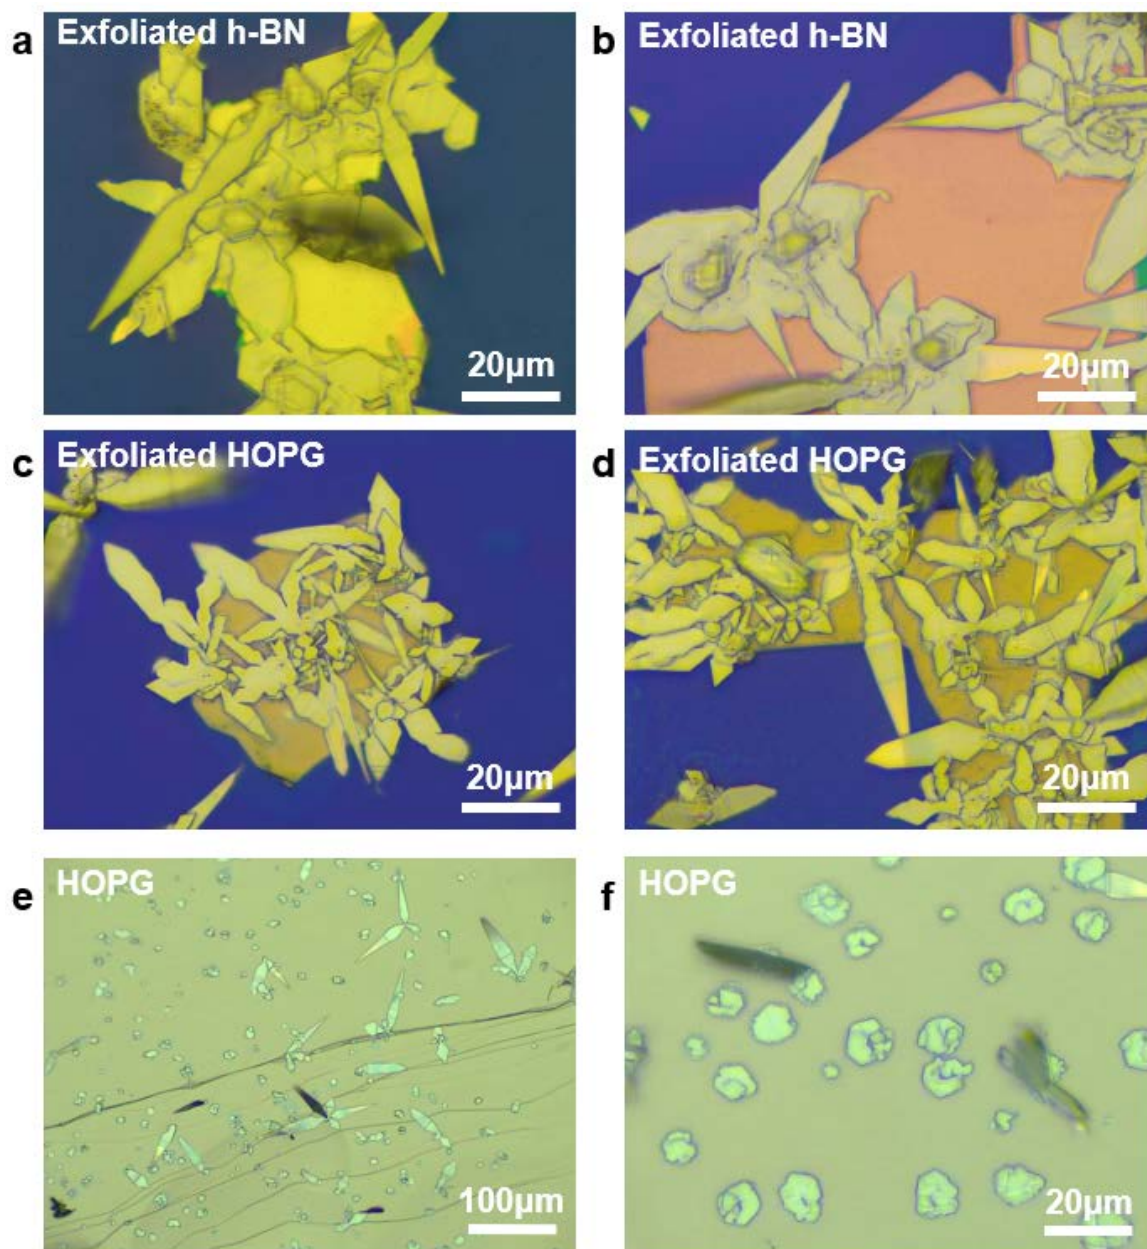

**Supplementary Figure S7.  $\gamma$ -GeSe grown on h-BN and HOPG.** (a,b) Optical images of  $\gamma$ -GeSe grown on exfoliated h-BN. The flakes grown from different seeds are connected. (c,d) Optical images of  $\gamma$ -GeSe grown on exfoliated HOPG. (e,f) Optical images of  $\gamma$ -GeSe grown on HOPG substrates.

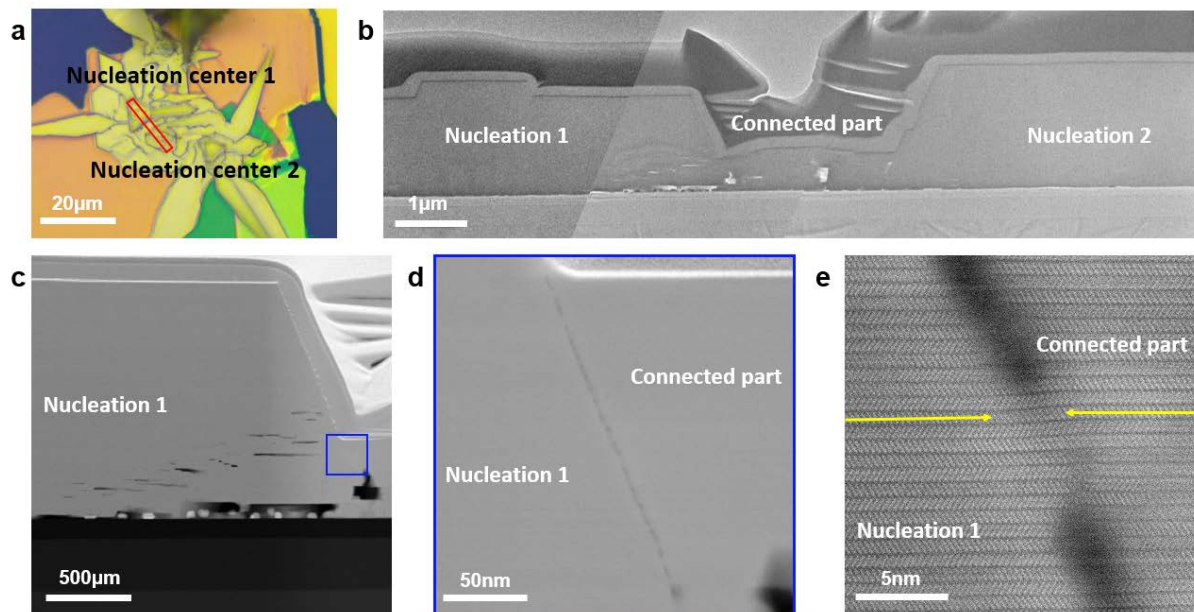

**Supplementary Figure S8. Investigation of  $\gamma$ -GeSe crystal connection grown on h-BN substrate.** (a) Optical image of connected  $\gamma$ -GeSe grown from different locations on h-BN. (b) Cross-sectioned TEM image of the area in the red box. (c) Magnified STEM image of nucleation 1 region. (d) Magnified STEM image of the area in the blue box of panel c. (e) STEM image showing the connection between nucleation 1 and the connected part. The yellow arrow shows the connection of the atomic layers of  $\gamma$ -GeSe.

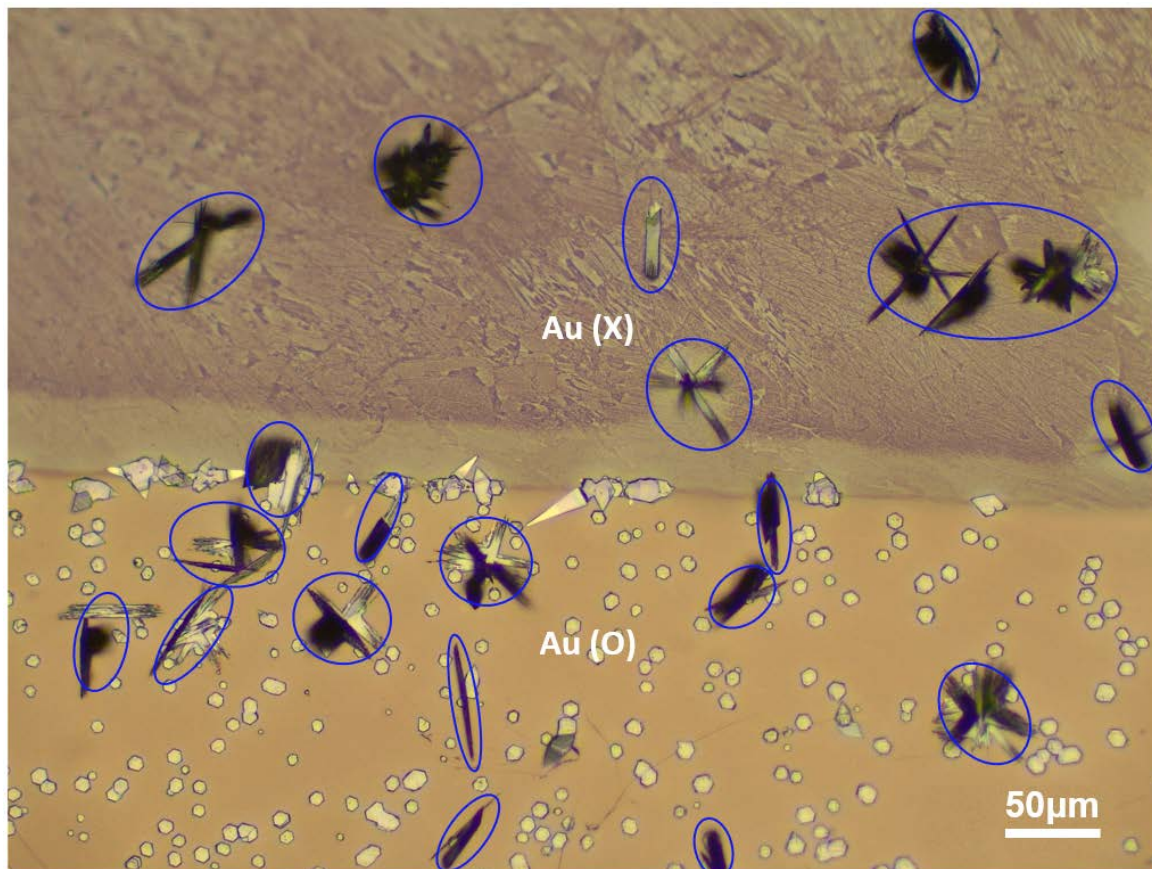

**Supplementary Figure S9. Synthesis of GeSe with and without Au on HOPG substrate.** Optical image of  $\gamma$ -GeSe synthesized by depositing Au on only half-bottom of the HOPG substrate.  $\gamma$ -GeSe grows only below the boundary line. The crystals marked with blue circles are  $\alpha$ -GeSe.

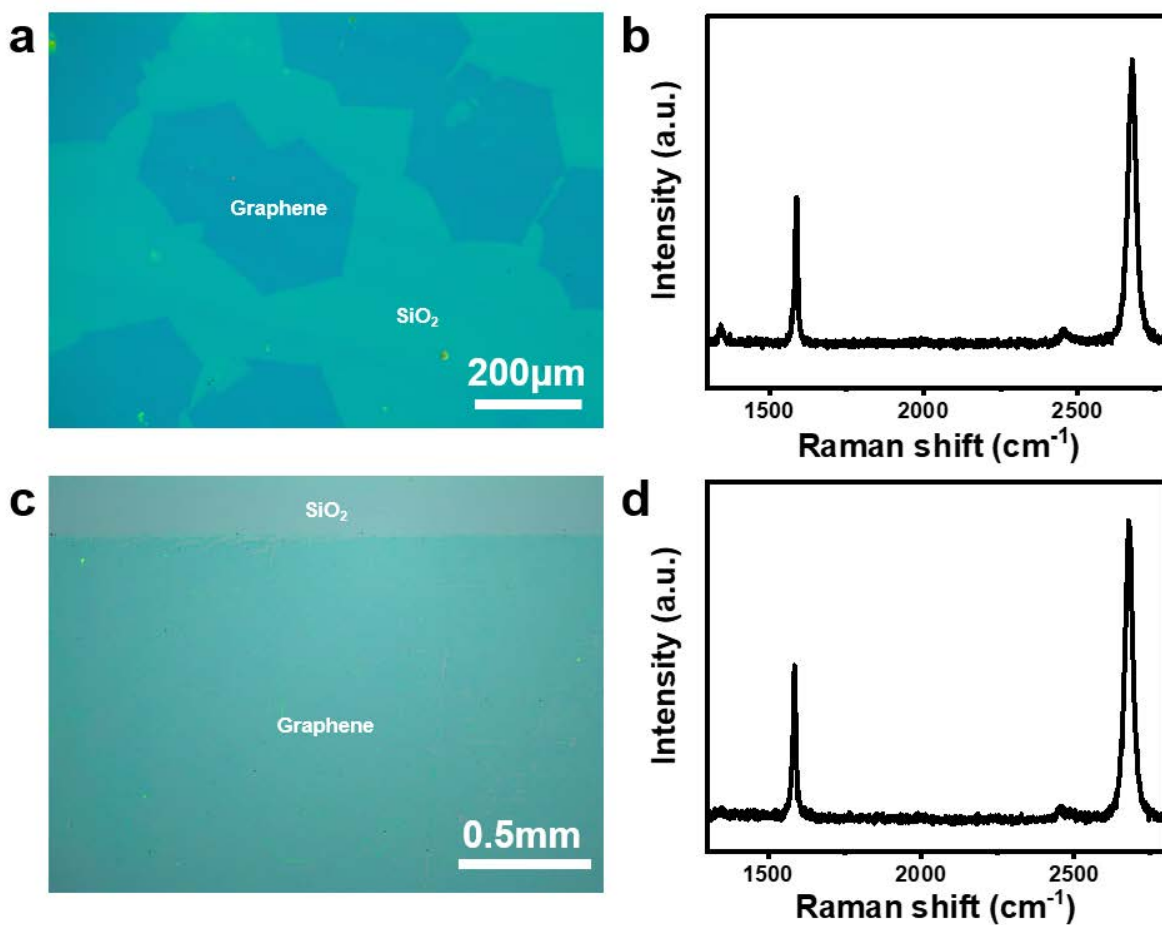

**Supplementary Figure S10. Characterizations of CVD graphene.** (a) Optical image of the single crystalline graphene on SiO<sub>2</sub>/Si substrate. (b) Raman spectrum of the single crystalline graphene. (c) Optical image of the polycrystalline graphene on SiO<sub>2</sub>/Si substrate (d) Raman spectrum of the polycrystalline graphene.

|                                 | <b>a [Å]</b> | <b>Lattice mismatch with <math>\gamma</math>-GeSe</b><br><b><math>100 \times (3a_{\text{substrate}} - 2a_{\gamma\text{-GeSe}})/2a_{\gamma\text{-GeSe}}</math></b> |
|---------------------------------|--------------|-------------------------------------------------------------------------------------------------------------------------------------------------------------------|
| <b><math>\gamma</math>-GeSe</b> | <b>3.73</b>  | <b>N. A.</b>                                                                                                                                                      |
| <b>h-BN</b>                     | <b>2.50</b>  | <b>0.54 %</b>                                                                                                                                                     |
| <b>Graphite</b>                 | <b>2.46</b>  | <b>-1.07 %</b>                                                                                                                                                    |

**Supplementary Table S1. Lattice parameters of  $\gamma$ -GeSe and hexagonal substrates.**
